# Supplementary material
Source: publisher figshare collection journal article supplement (https://acs.figshare.com/ndownloader/files/4206844)
Supplement: Supplementary file 1 [file 4206844]

## Supporting Information

### Triphenylamine Dendronized Iridium(III) Complexes: Robust Synthesis and Highly Efficient Nondoped Orange Electrophosphorescence and the Structure-Property Relationship

By Minrong Zhu, Jianhua Zou, Xun He, Chuluo Yang,\* Hongbin Wu,\* Cheng Zhong, Jingui Qin, and Yong Cao

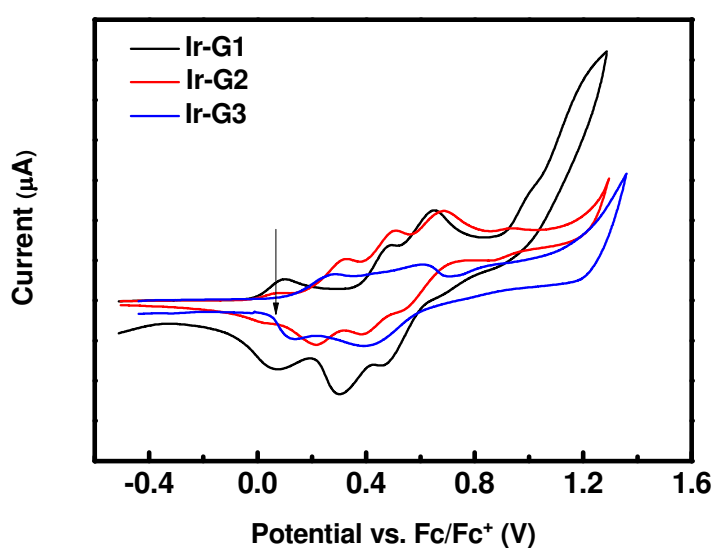

**Figure S1.** Oxidation scan curves of cyclic voltammograms for the dendrimers in  $\text{CH}_2\text{Cl}_2$ .

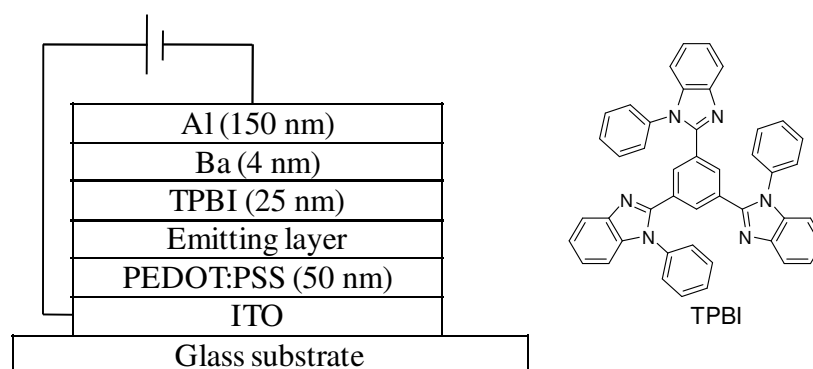

**Figure S2.** The EL device architecture and the molecular structure of TPBI.

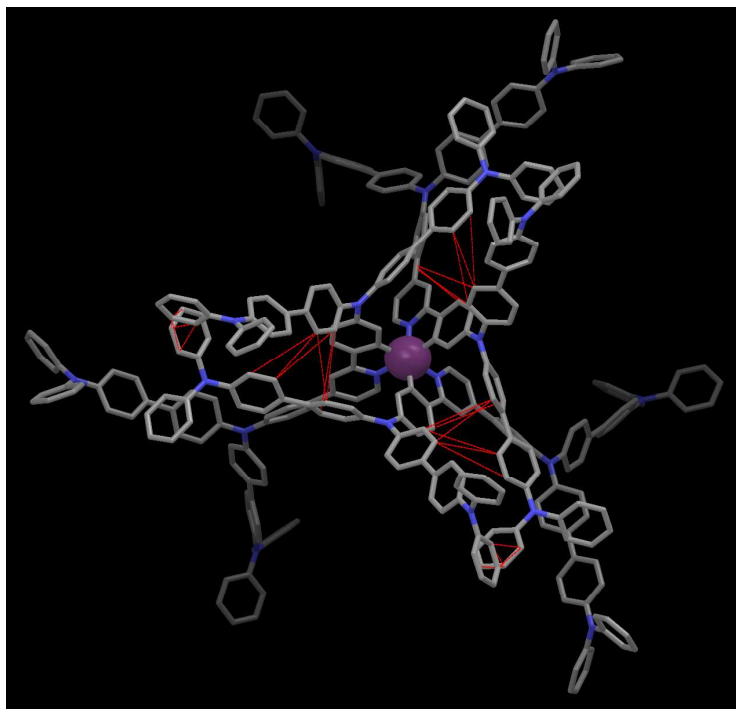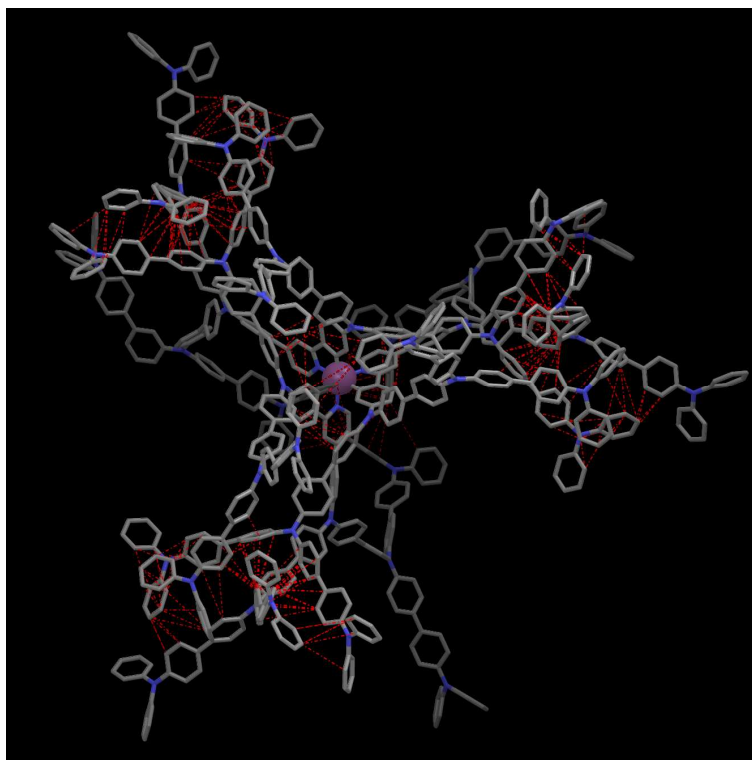

**Figure S3.** Closest contacts in **Ir-G2** (top) and **Ir-G3** (down).
